# Supplementary material for: Automated long-term recording and analysis of neural activity in behaving animals
Source: eLife journal article supplement (doi:10.7554/elife.27702), 2017-09-08
Supplement: supp [file elife-27702-supp-v1.zip]

Archive with 12 entries (12 files):
- elife_poa_e27702_Figure_1_Supplement_1.pdf
- elife_poa_e27702_Figure_2_Supplement_3.pdf
- elife_poa_e27702_Figure_5_Supplement_1.pdf
- elife_poa_e27702_Transparent_Reporting_File.docx
- elife_poa_e27702_Figure_7_Supplement_1.pdf
- elife_poa_e27702_Figure_2_Supplement_2.pdf
- elife_poa_e27702_Figure_3_Supplement_2.pdf
- elife_poa_e27702_Figure_3_Supplement_1.pdf
- elife_poa_e27702_Figure_2_Supplement_1.pdf
- elife_poa_e27702_Figure_2_Supplement_4.pdf
- elife_poa_e27702_Figure_8_Supplement_1.pdf
- elife_poa_e27702_Figure_4_Supplement_1.pdf
