# Supplementary material for: Automated long-term recording and analysis of neural activity in behaving animals
Source: eLife journal article supplement (doi:10.7554/elife.27702), 2017-09-08

**Figure 3 - figure supplement 1**

**A**

Extracellular-intracellular recodings

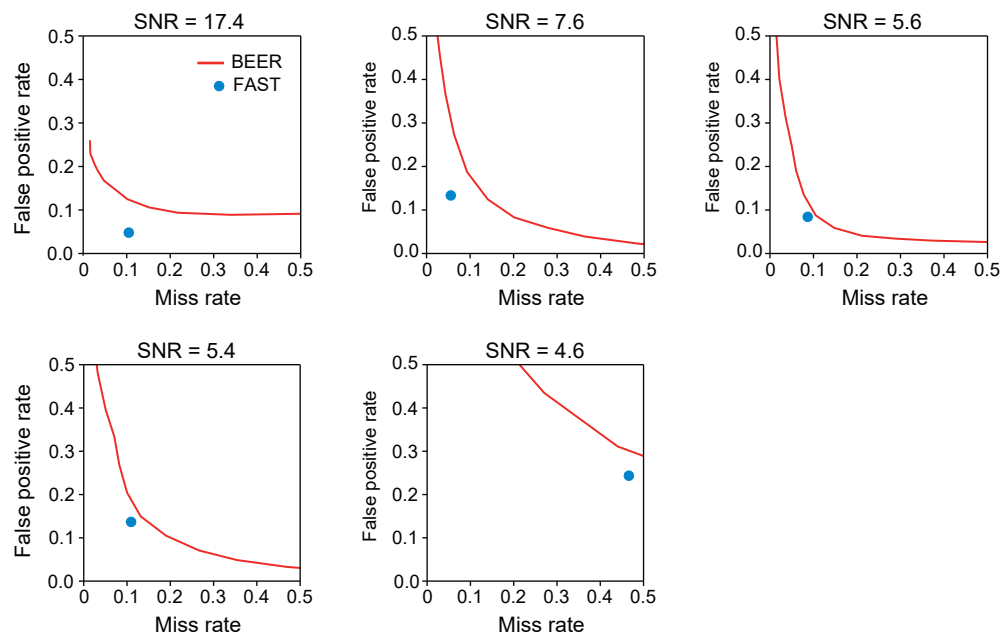

**B**

Synthetic single electrode datasets

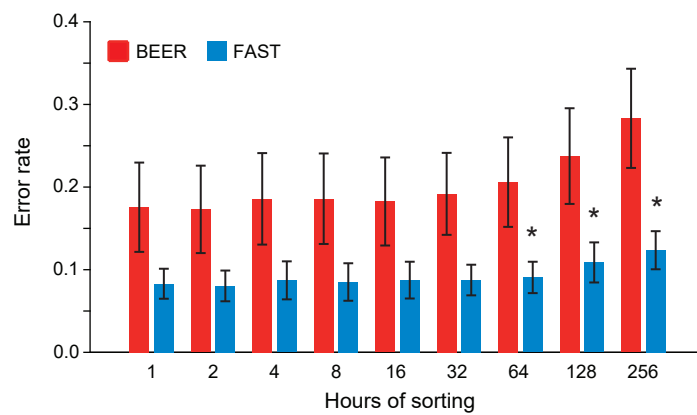

Supplement: supp [file elife-27702-supp-v1.zip › elife_poa_e27702_Figure_3_Supplement_1.pdf]
