# Supplementary material for: Automated long-term recording and analysis of neural activity in behaving animals
Source: eLife journal article supplement (doi:10.7554/elife.27702), 2017-09-08

**Figure 3 - figure supplement 2**

Signal-dependent variation in spike amplitudes

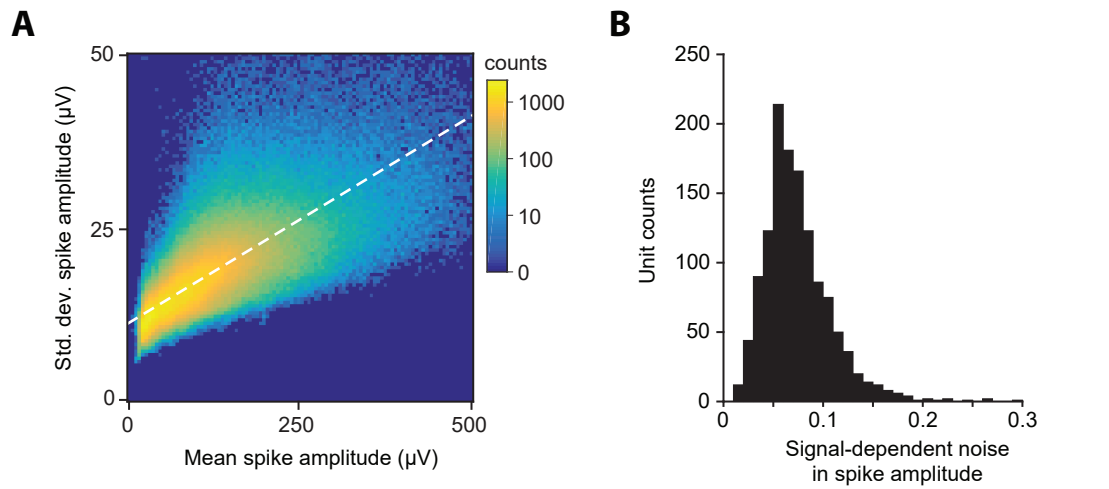

Variation in spike-amplitudes over time

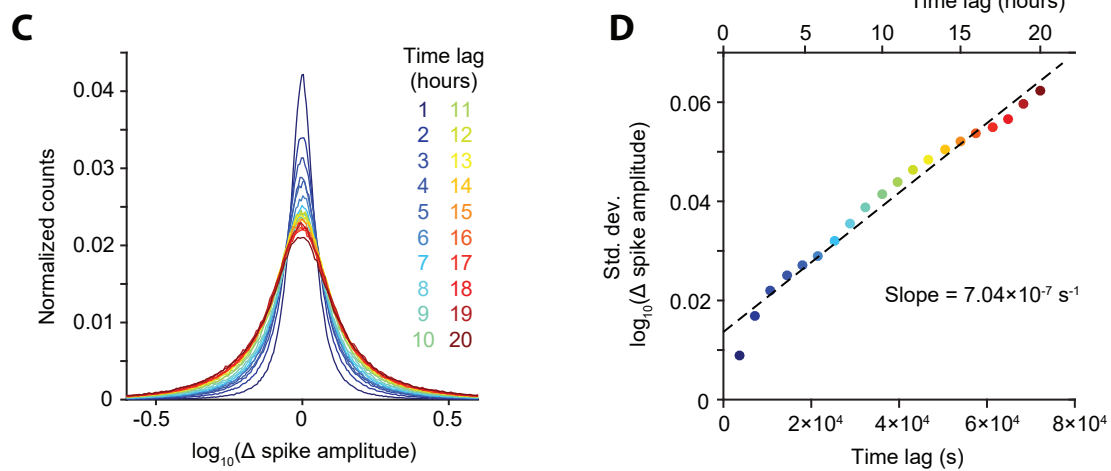

**E** Distribution of maximal spike amplitudes

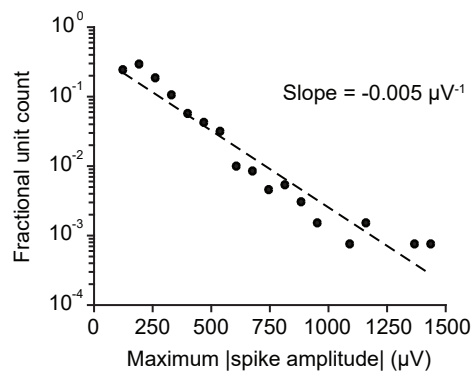

Supplement: supp [file elife-27702-supp-v1.zip › elife_poa_e27702_Figure_3_Supplement_2.pdf]
