# Supplementary figures and images for: Automated long-term recording and analysis of neural activity in behaving animals
Source: eLife journal article supplement (doi:10.7554/elife.27702), 2017-09-08

**Figure 1 - figure supplement 1**

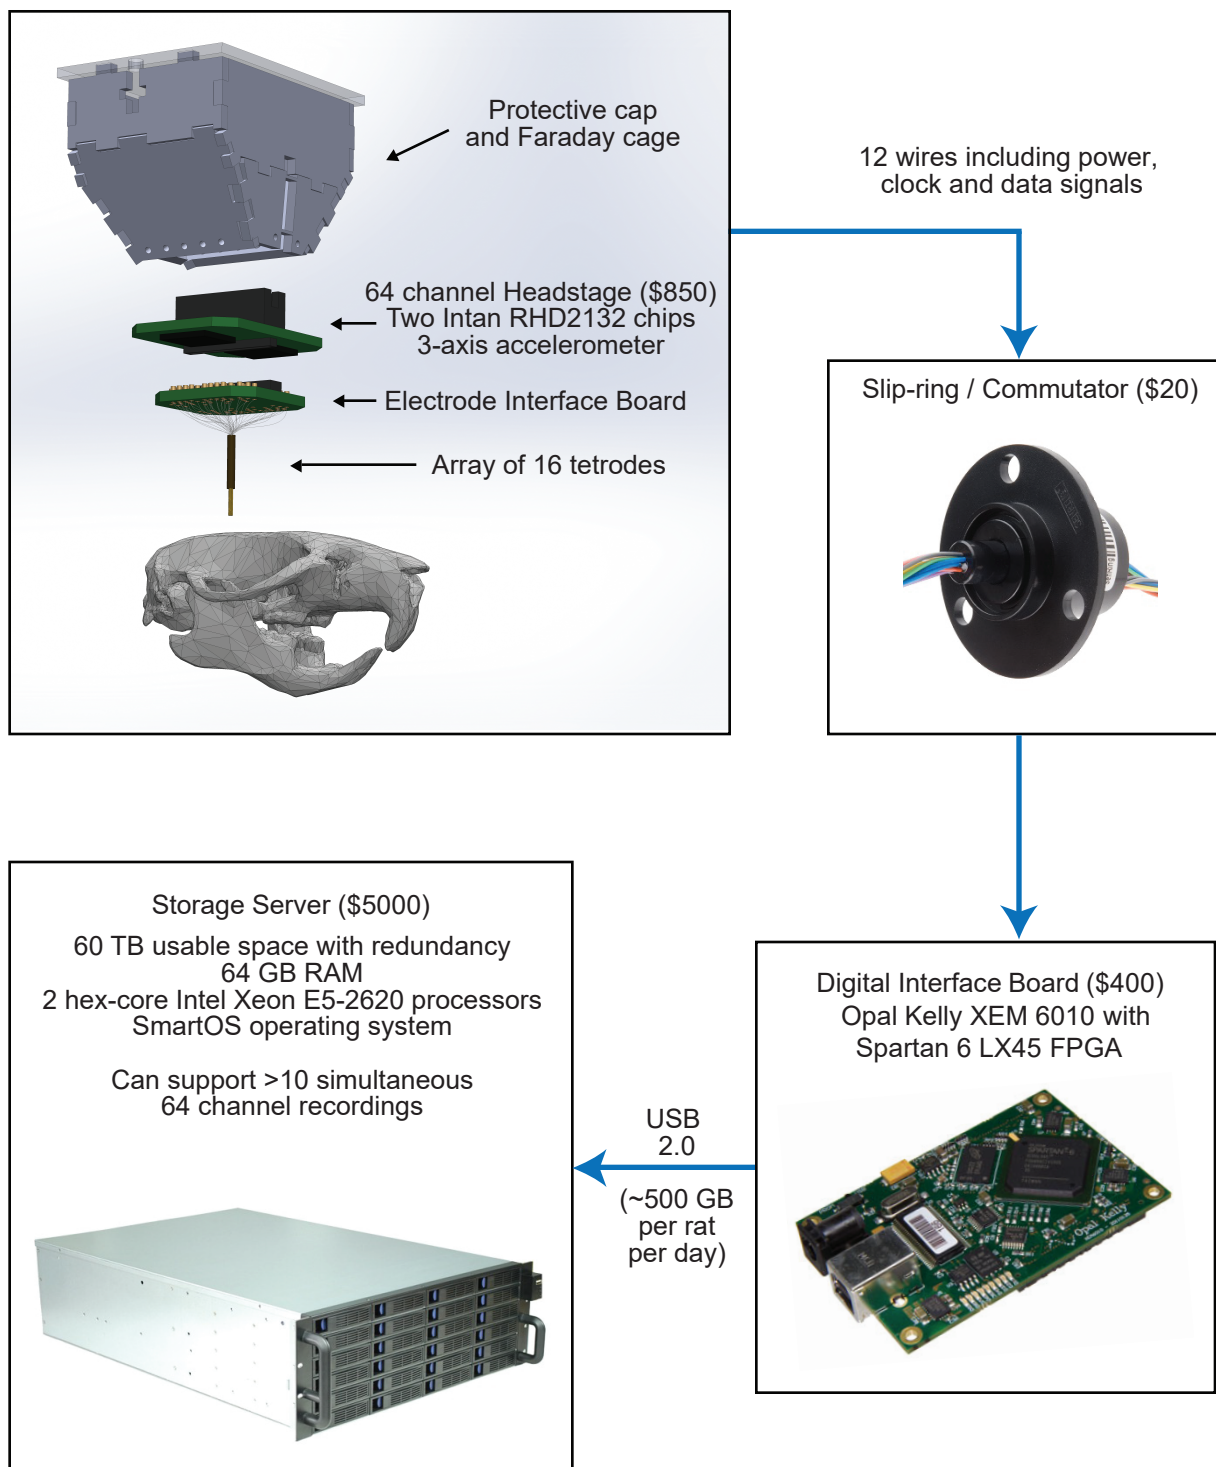

Supplement: supp [file elife-27702-supp-v1.zip › elife_poa_e27702_Figure_1_Supplement_1.pdf]

**Figure 2 – figure supplement 3**

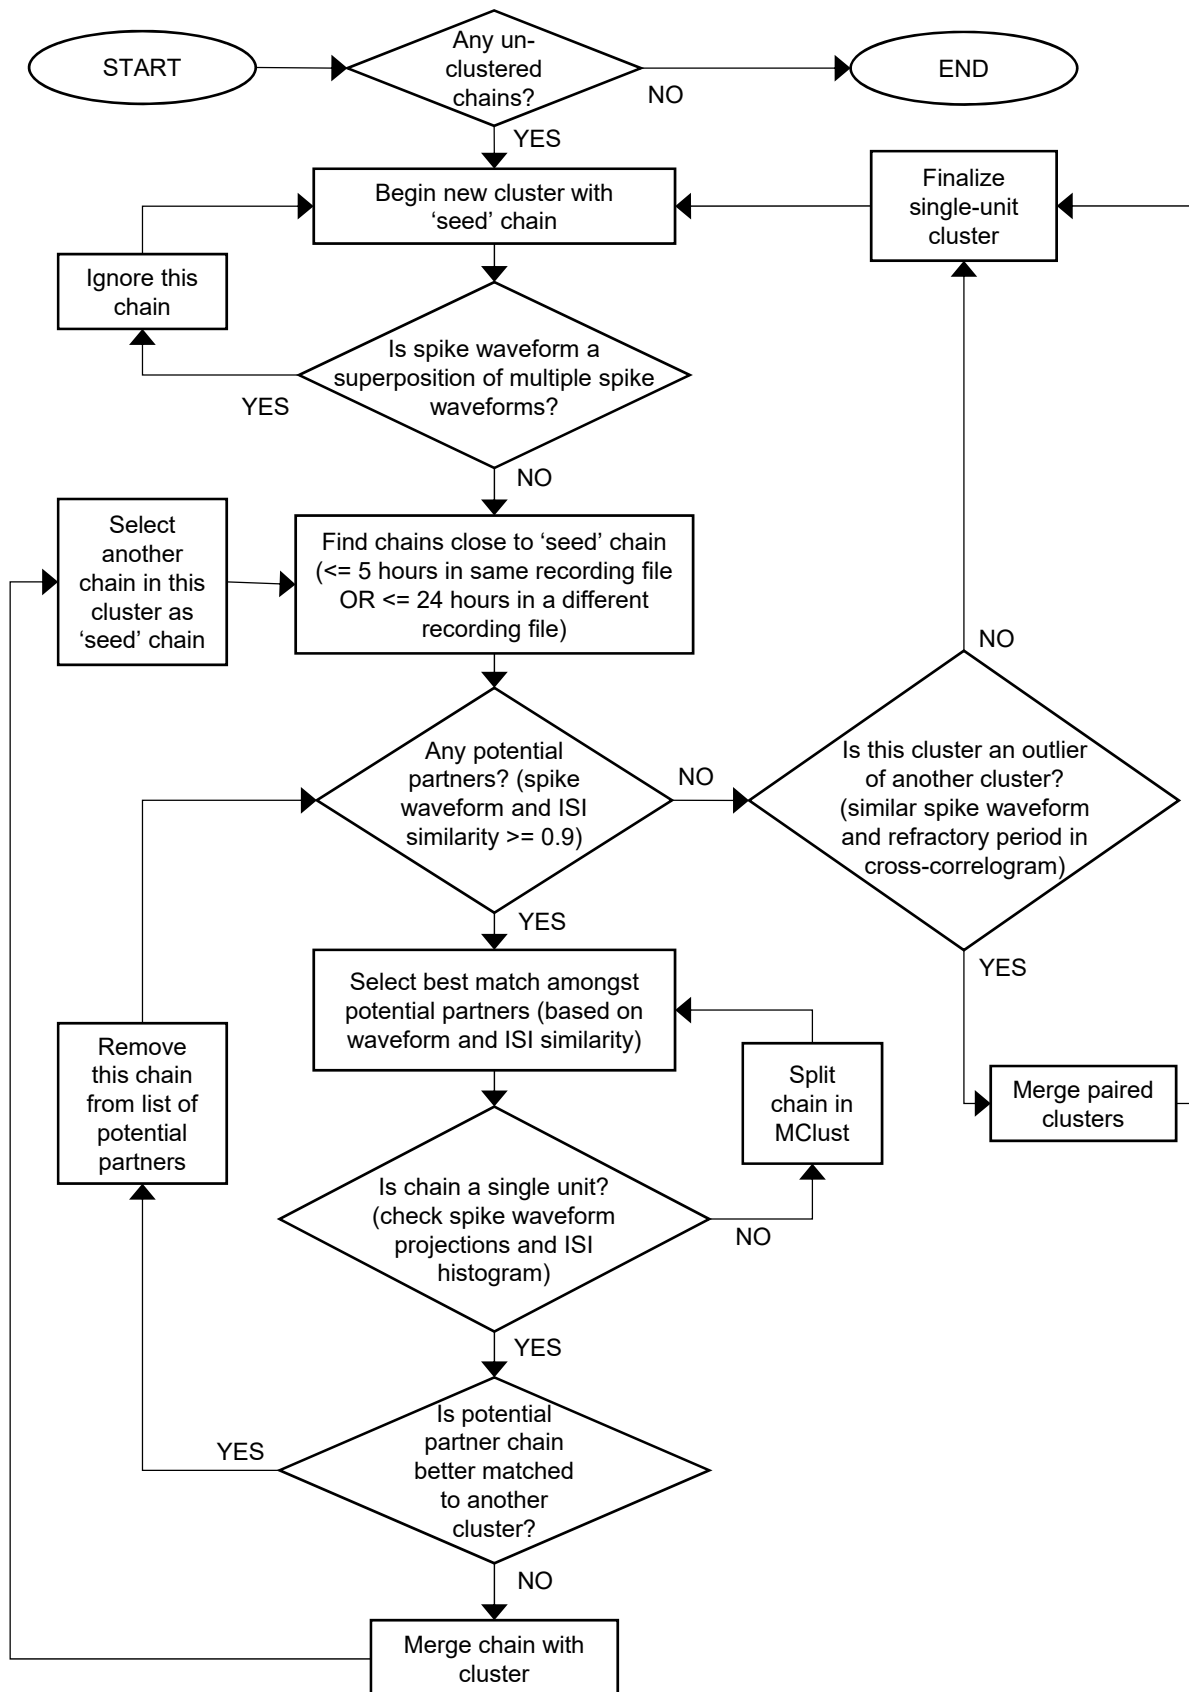

Supplement: supp [file elife-27702-supp-v1.zip › elife_poa_e27702_Figure_2_Supplement_3.pdf]

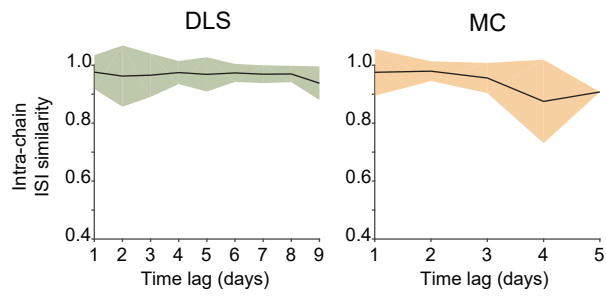

**Figure 5 - figure supplement 1**  
**Dhawale et al. 2017**

Supplement: supp [file elife-27702-supp-v1.zip › elife_poa_e27702_Figure_5_Supplement_1.pdf]

Figure 7 - figure supplement 1

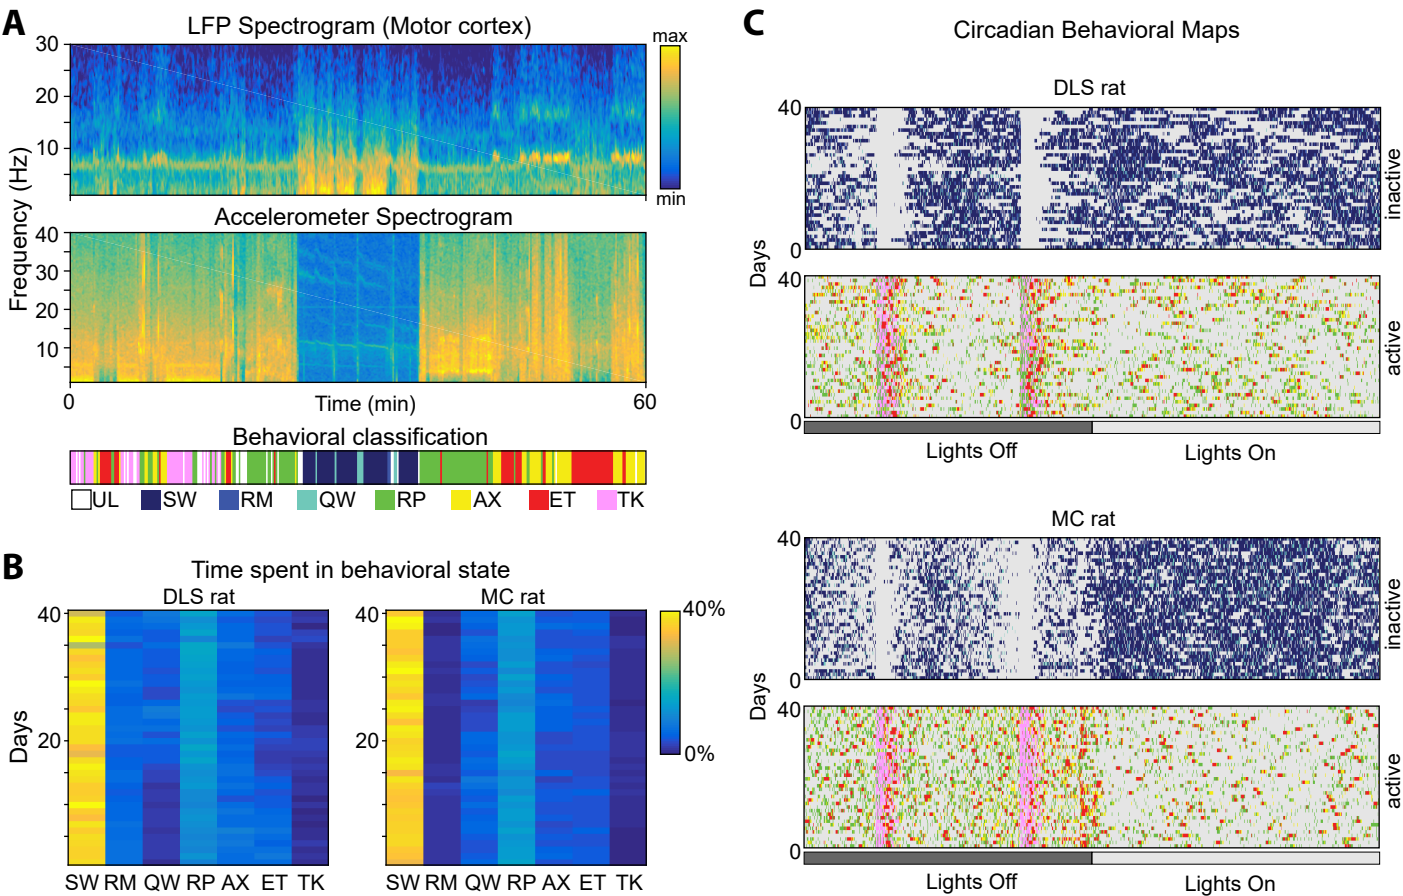

Supplement: supp [file elife-27702-supp-v1.zip › elife_poa_e27702_Figure_7_Supplement_1.pdf]

**Figure 2 - figure supplement 2**

**FAST: Step 1**

**A**

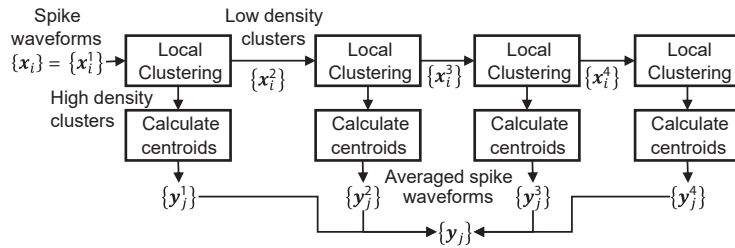

**B**

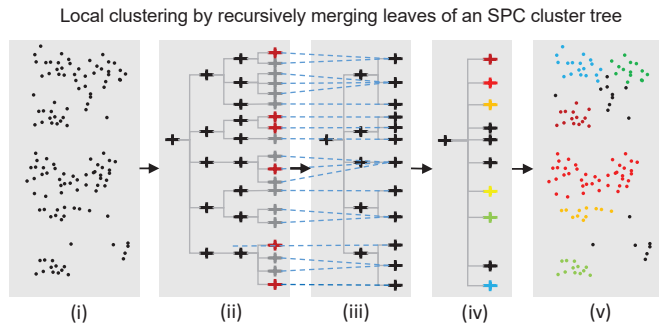

**C**

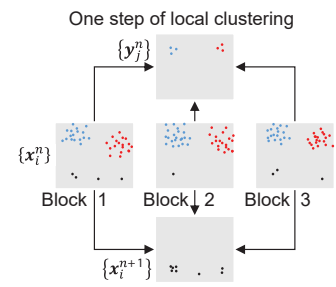

**D**

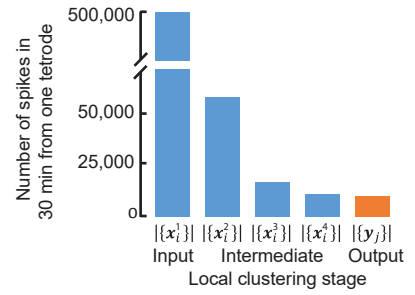

**FAST: Step 2**

**E**

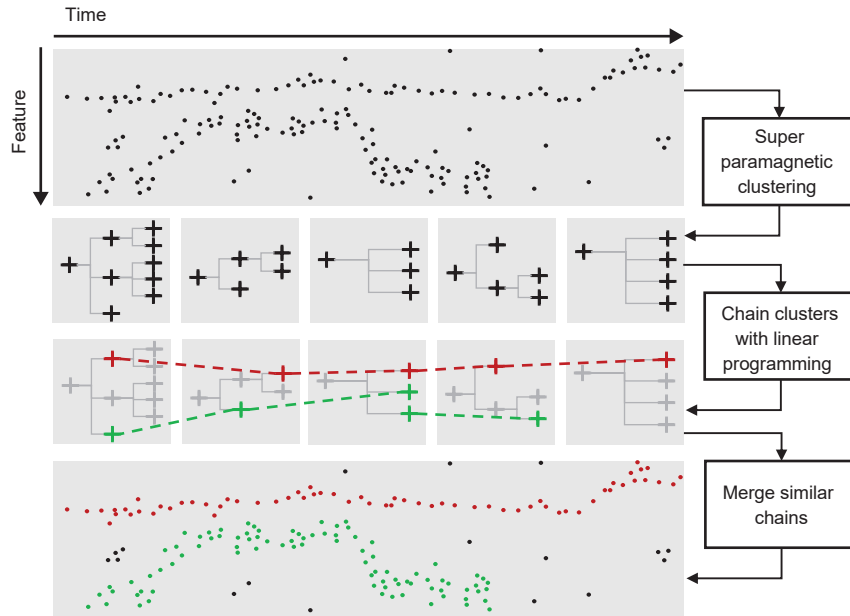

**F**

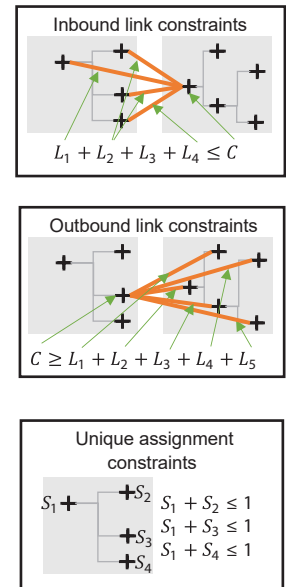

Supplement: supp [file elife-27702-supp-v1.zip › elife_poa_e27702_Figure_2_Supplement_2.pdf]

**Figure 2 - figure supplement 1**

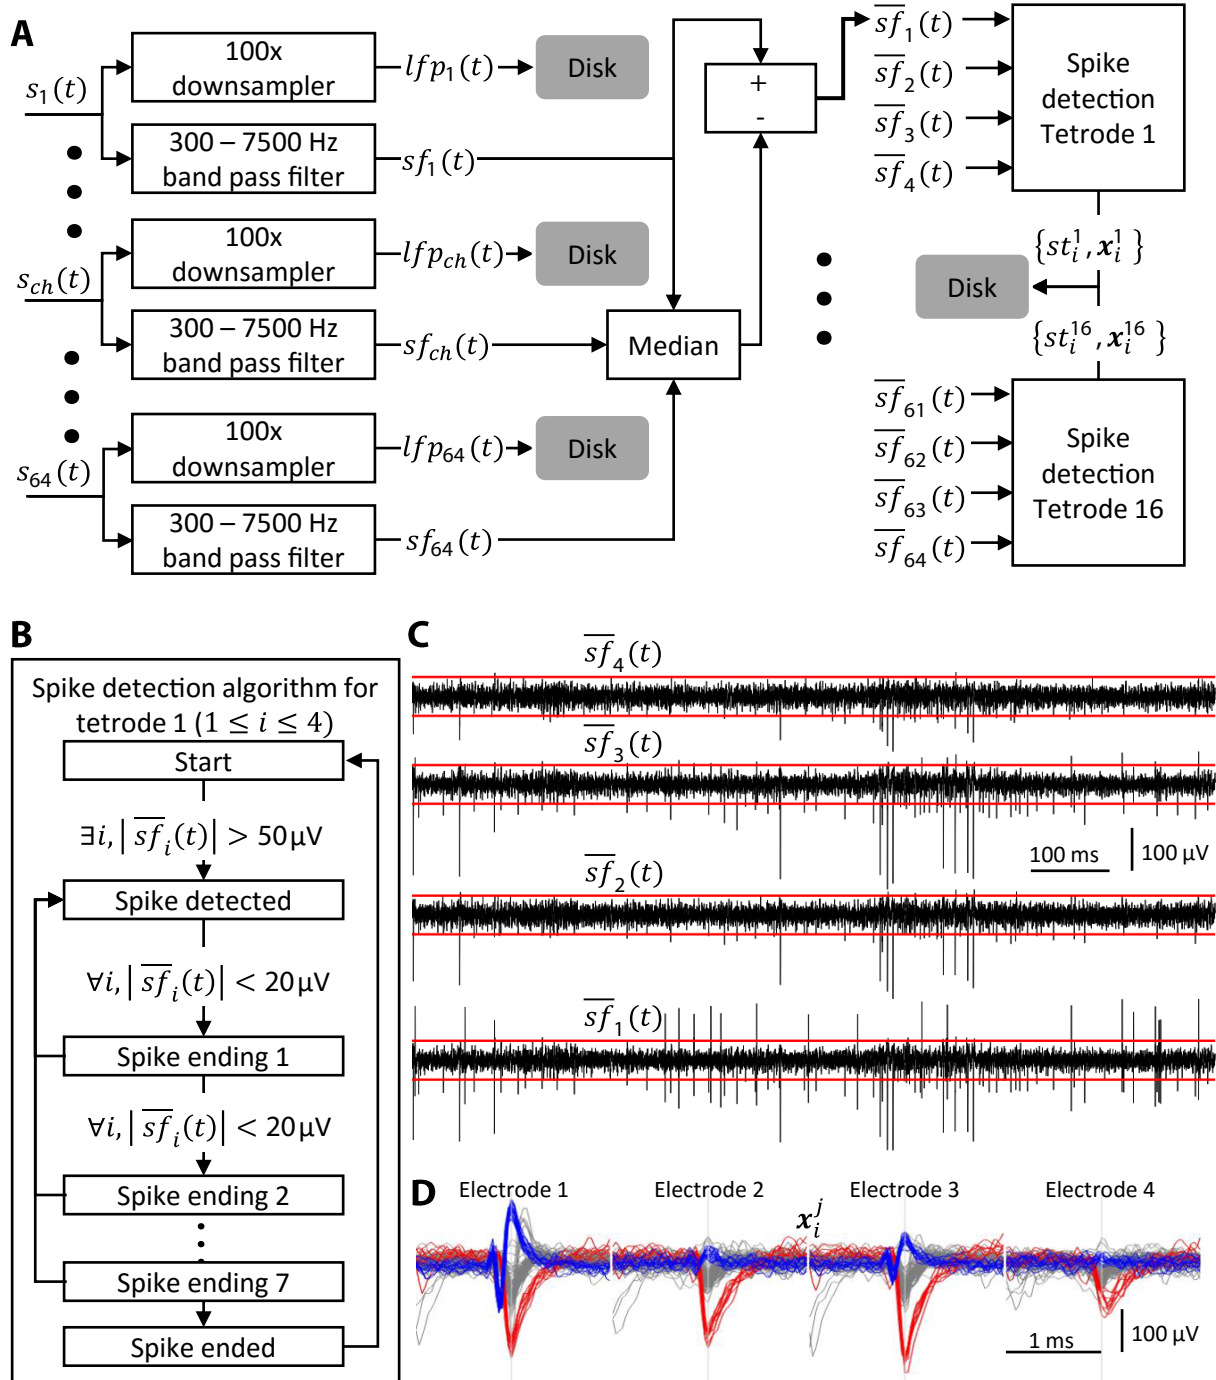

Supplement: supp [file elife-27702-supp-v1.zip › elife_poa_e27702_Figure_2_Supplement_1.pdf]

**Figure 2 - figure supplement 4**

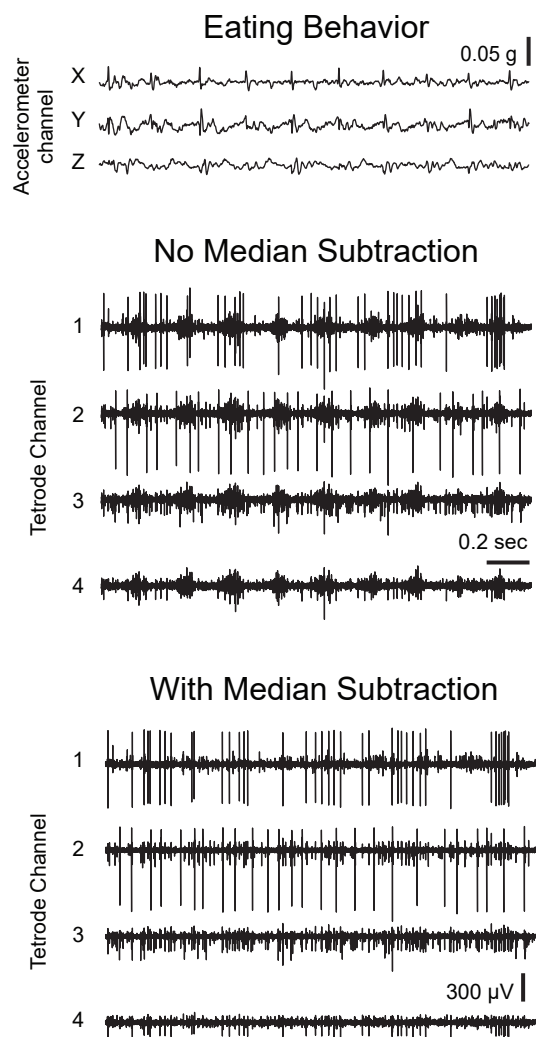

Supplement: supp [file elife-27702-supp-v1.zip › elife_poa_e27702_Figure_2_Supplement_4.pdf]

**Figure 8 - figure supplement 1**

**A**

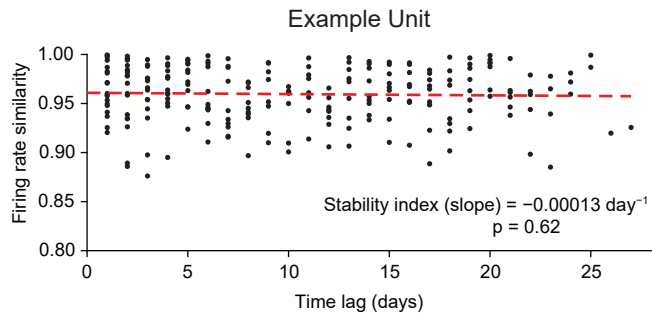

**B**

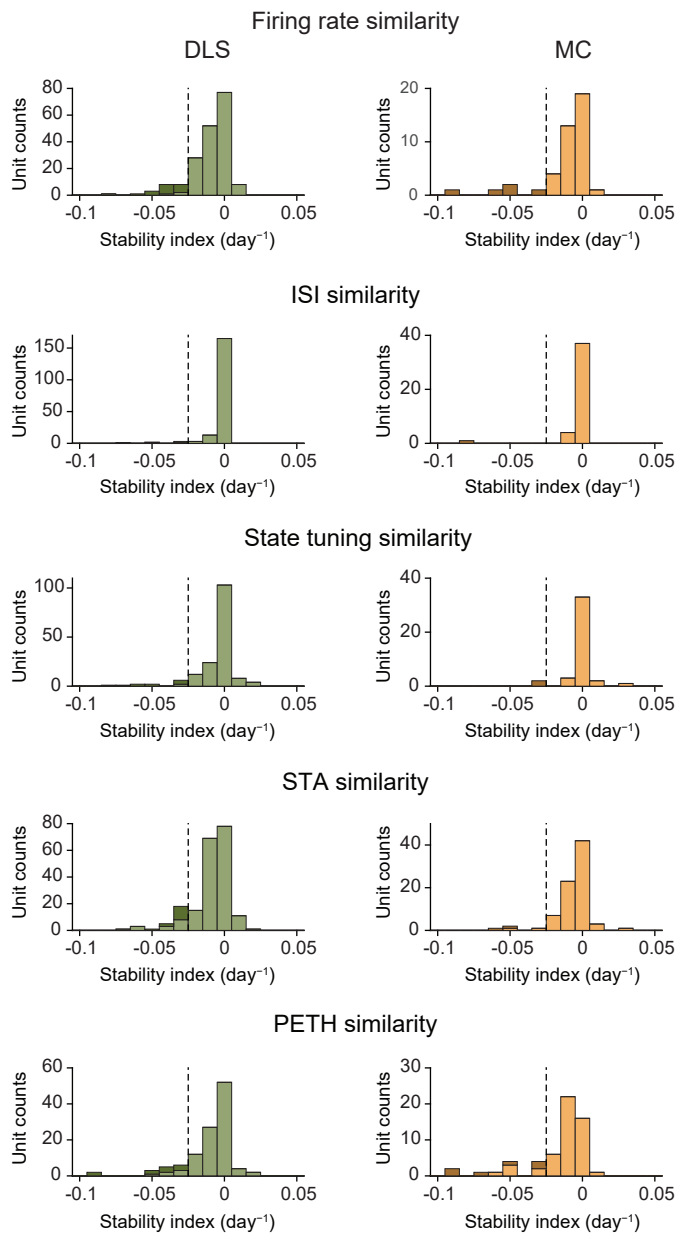

Supplement: supp [file elife-27702-supp-v1.zip › elife_poa_e27702_Figure_8_Supplement_1.pdf]

Figure 4 - figure supplement 1

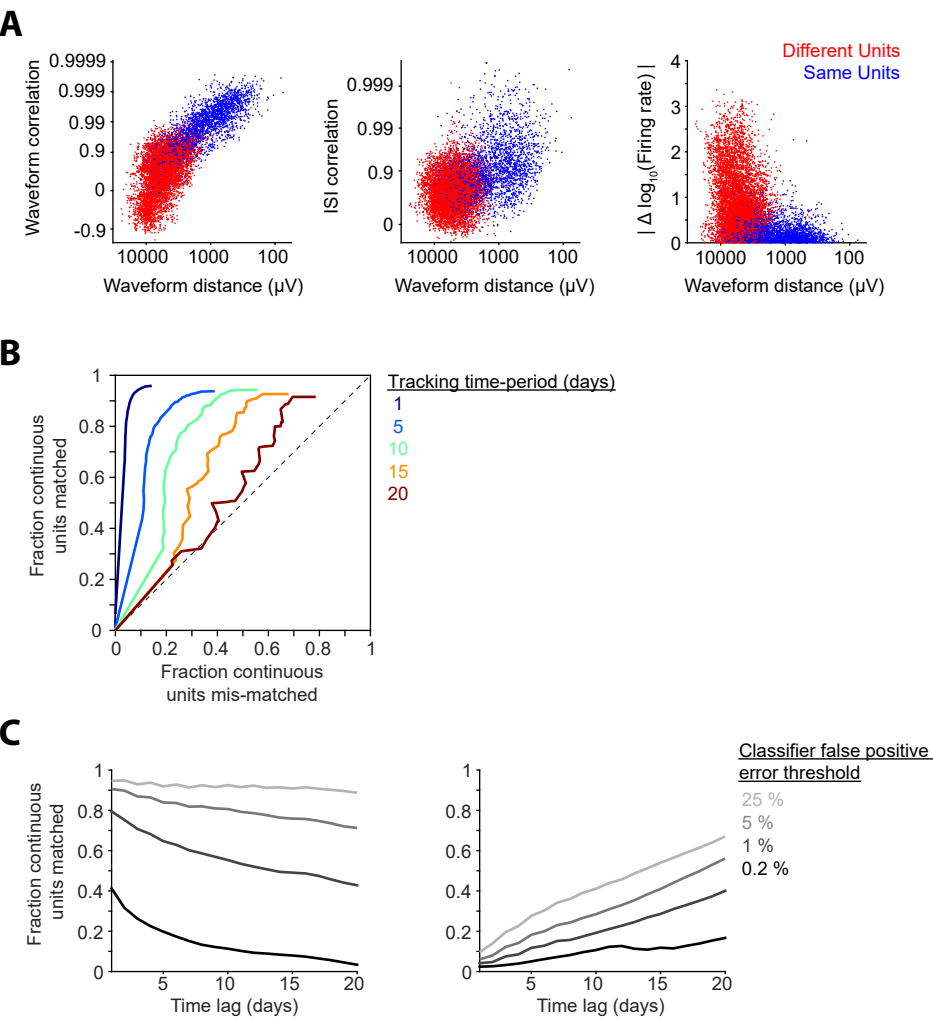

Supplement: supp [file elife-27702-supp-v1.zip › elife_poa_e27702_Figure_4_Supplement_1.pdf]
